# Supplementary material
Source: MDPI journal article supplement (https://www.mdpi.com/2673-396X/1/1/2)
Supplement: s1 [file s1]

## Supplementary details: CHO snack ingredients

### CHO Snack

**Ingredients:** Enriched Wheat Flour (Wheat Flour, Ascorbic Acid Added As Dough Conditioner, Niacin, Reduced Iron, Thiamine Mononitrate, Riboflavin, Enzymes, Folic Acid), Sugar, Soybean and/Or Canola Oil, Blueberries, Eggs, Water, Cultured Buttermilk (Cultured Part-Skim Milk, Salt, Sodium Citrate), Baking Powder (Sodium Acid Pyrophosphate, Sodium Bicarbonate, Cornstarch, Monocalcium Phosphate), Salt, Margarine (Soybean Oil, Modified Palm Oil, Canola Oil, Water, Salt, Whey [Milk], Soy Lecithin, Monoglycerides of Fatty Acids, Natural Flavor, Annatto Extract Color, Vitamin A Palmitate, Citric Acid, Vitamin D3), Dextrose, Whey (Milk), Cultured Wheat Flour, Artificial Flavor, Mono- and Diglycerides, Egg Whites, Cellulose Gum, Sodium Stearoyl Lactylate, Xanthan Gum, Sodium Bicarbonate, Citric Acid, Soy Lecithin.

### Supplementary Table S1: Nutrition Profile

| <b>Nutrient</b>     | <b>Absolute Value</b> | <b>Percent Daily Value</b> |
|---------------------|-----------------------|----------------------------|
| Total fat           | 18 g                  | 28                         |
| Saturated fat       | 5 g                   | 25                         |
| Trans fat           | 0 g                   | 0                          |
| Cholesterol         | 55 mg                 | 18                         |
| Sodium              | 290 mg                | 12                         |
| Total Carbohydrates | 47 g                  | 16                         |
| Dietary fiber       | 2 g                   | 8                          |
| Sugars              | 30 g                  | -                          |
| Protein             | 5 g                   | -                          |
| Vitamin A           | -                     | 0                          |
| Vitamin C           | -                     | 0                          |
| Calcium             | -                     | 2                          |
| Iron                | -                     | 15                         |
